1 **Connections between freshwater carbon and nutrient cycles revealed through**  
2 **reconstructed population genomes**

3 Alexandra M. Linz<sup>1\*</sup>, Shaomei He<sup>1,2</sup>, Sarah L. R. Stevens<sup>1</sup>, Karthik Anantharaman<sup>1</sup>, Robin R.  
4 Rohwer<sup>3</sup>, Rex R. Malmstrom<sup>4</sup>, Stefan Bertilsson<sup>5</sup>, Katherine D. McMahon<sup>1,6</sup>

5 <sup>1</sup>Department of Bacteriology, University of Wisconsin–Madison, <sup>2</sup>Department of Geoscience,  
6 University of Wisconsin-Madison, <sup>3</sup>University of Wisconsin-Madison Environmental Chemistry  
7 and Technology Program, <sup>4</sup>Department of Energy Joint Genome Institute, <sup>5</sup>Department of  
8 Ecology and Genetics, Limnology and Science for Life Laboratory, Uppsala University,  
9 <sup>6</sup>Department of Civil and Environmental Engineering, University of Wisconsin–Madison,

10

11 \*Corresponding author: Alexandra Linz, Department of Bacteriology, University of Wisconsin  
12 1550 Linden Drive Room 5525 Madison, WI 53706, Email: [amlinz@wisc.edu](mailto:amlinz@wisc.edu)

13

14 Abstract word count: 239

15 Article word count: 6,221 (including citations and headers)

16

17 Running title: Connections between nutrient cycles

18

19

20

## 21 **Abstract**

22           Metabolic processes at the microbial scale influence ecosystem functions because  
23 microbes are responsible for much of the carbon and nutrient cycling in freshwater. One  
24 approach to predict the metabolic capabilities of microbial communities is to search for  
25 functional marker genes in metagenomes. However, this approach does not provide context  
26 about co-occurrence with other metabolic traits within an organism or detailed taxonomy about  
27 those organisms. Here, we combine a functional marker gene analysis with metabolic pathway  
28 prediction of microbial population genomes (MAGs) assembled from metagenomic time series  
29 in eutrophic Lake Mendota and humic Trout Bog to identify how carbon and nutrient cycles are  
30 connected in freshwater. We found that phototrophy, carbon fixation, and nitrogen fixation  
31 pathways co-occurred in *Cyanobacteria* MAGs in Lake Mendota and in *Chlorobiales* MAGs in  
32 Trout Bog. *Cyanobacteria* MAGs also had strong temporal correlations to functional marker  
33 genes for nitrogen fixation in several years. Genes encoding steps in the nitrogen and sulfur  
34 cycles varied in abundance and taxonomy by lake, potentially reflecting the availability and  
35 composition of inorganic nutrients in these systems. We were also able to identify which  
36 populations contained the greatest density and diversity of genes encoding glycoside hydrolases.  
37 Populations with many glycoside hydrolases also encoded pathways for sugar degradation. By  
38 using both MAGs and marker genes, we were better able to link functions to specific taxonomic  
39 groups in our metagenomic time series, enabling a more detailed understanding of freshwater  
40 microbial carbon and nutrient cycling.

## 41 **Introduction**

42           Lakes collect nutrients from surrounding terrestrial ecosystems (Williamson et al., 2008),  
43 placing lakes as “hotspots” for carbon and nutrient cycling in the landscape (Butman et al.,

44 2015). Much of this biogeochemical cycling is performed by freshwater microbes. We have  
45 learned much about freshwater microbes through previous research that has revealed high levels  
46 of diversity and change over time in freshwater microbial communities (Allgaier & Grossart,  
47 2006), the geographic distribution of freshwater taxa (Šimek et al., 2010), the distribution of  
48 functional marker genes (Peura et al., 2012, 2015; Ramachandran & Walsh, 2015; Eiler et al.,  
49 2016), and substrate use capabilities in specific phylogenetic groups (Salcher, Posch &  
50 Pernthaler, 2013). However, organism-level information about microbial metabolism is currently  
51 not well incorporated into conceptual models of freshwater carbon and nutrient cycling.

52         Although aquatic microbes are often classified either exclusively as decomposers or  
53 phytoplankton, their roles and relative importance in the food chain are now recognized as  
54 distinct and complex (Pomeroy & Wiebe, 1988). Dissolved organic carbon (DOC) is produced at  
55 every trophic level, but this carbon is often not in a form directly available for consumption by  
56 secondary or tertiary trophic levels. Instead, microbes are responsible for processing this  
57 complex, recalcitrant DOC, producing more labile biomass that is subsequently consumed. This  
58 process of maintaining DOC within the food web is known as the “microbial loop” (Azam et al.,  
59 1983), although aquatic microbes respire much of the DOC to CO<sub>2</sub>. In some systems, microbial  
60 respiration is thought to exceed primary production, resulting in the release of excess of CO<sub>2</sub> to  
61 the atmosphere (del Giorgio, Cole & Cimbleris, 1997). Inorganic compounds can be used as  
62 nitrogen and sulfur sources, or they can provide energy to chemolithotrophs that are in turn  
63 consumed by other trophic levels. Microbial conversions of inorganic compounds are often just  
64 as crucial to freshwater biogeochemistry as the degradation of DOC.

65         Previously, we used time series metagenomics to assemble nearly 200 metagenome-  
66 assembled genomes (MAGs) from two temperate lakes: Lake Mendota, a highly productive

67 eutrophic lake, and Trout Bog, a humic bog lake (Bendall et al., 2016). These MAGs were used  
68 to study genome-wide diversity sweeps in Trout Bog (Bendall et al., 2016), to build metabolic  
69 networks of the ubiquitous freshwater *Actinobacteria* acI (Hamilton et al., 2017), and to propose  
70 functions for freshwater *Verrucomicrobia* (He et al., 2017). In addition to this body of  
71 knowledge based on the MAG dataset, previous time series analyses of 16S rRNA gene  
72 amplicon datasets from both lakes provide an understanding of taxon dynamics over time (Hall  
73 et al., 2017; Linz et al., 2017). Lake Mendota and Trout Bog are ideal sites for comparative time  
74 series metagenomics because of their history of extensive environmental sampling by the North  
75 Temperate Lakes - Long Term Ecological Research program (NTL-LTER,  
76 <http://lter.limnology.wisc.edu>) and their contrasting limnological attributes (Table 1, Table S1).  
77 Here, we build on this previous work by identifying contrasting patterns of carbon and nutrient  
78 cycling between the lakes based on analyses of functional marker genes and MAGs.

79 Gene-centric methods are one method that can identify community functions, while  
80 analysis of population genomes using MAGs can identify coupled metabolic processes taking  
81 place within the boundary of a cell. In this research, we use functional marker genes and MAGs  
82 from two freshwater lakes with contrasting chemistry to yield insights about microbial  
83 metabolism in freshwater ecosystems. We identified genes and pathways purportedly involved in  
84 primary production, DOC mineralization, and nitrogen and sulfur cycling. Some types of  
85 metabolisms were found in both sites despite their different chemistry profiles, but in different  
86 taxonomic groups. We demonstrate how MAGs and metagenomic time series can be used to  
87 track specific phylogenetic groups capable of key biogeochemical transformations. Finally, we  
88 introduce the MAG collection as a valuable community resource for other freshwater microbial  
89 ecologists to mine and incorporate into comparative studies across lakes around the world.

## 90 **Methods**

### 91 **Sampling**

92 Samples were collected from Lake Mendota and Trout Bog as previously described  
93 (Bendall et al., 2016). Briefly, integrated samples of the water column were collected during the  
94 ice-free periods of 2007-2009 in Trout Bog and 2008-2012 in Lake Mendota. In Lake Mendota,  
95 the top 12 meters of the water column were sampled, approximating the epilimnion (upper,  
96 oxygenated, and warm thermal layer). The epilimnion and hypolimnion (bottom, anoxic, and  
97 cold thermal layer) of Trout Bog were sampled separately at depths determined by measuring  
98 temperature and dissolved oxygen concentrations. The sampling depths were most often 0-2  
99 meters for the epilimnion and 2-7 meters for the hypolimnion. DNA was collected by filtering  
100 150 mL of the integrated water samples on 0.2- $\mu$ m pore size polyethersulfone Supor filters (Pall  
101 Corp., Port Washington, NY, USA). Filters were stored at -80C until extraction using the  
102 FastDNA Spin Kit (MP Biomedicals, Burlingame, CA, USA).

### 103 **Sequencing**

104 As previously described (Bendall et al., 2016; Roux et al., 2017), metagenomic  
105 sequencing was performed by the Department of Energy Joint Genome Institute (DOE JGI)  
106 (Walnut Creek, CA, USA). A total of 94 samples were sequenced for Lake Mendota, while 47  
107 metagenomes were sequenced for each layer in Trout Bog. Samples were sequenced on the  
108 Illumina HiSeq 2500 platform (Illumina, San Diego, CA, USA), except for four libraries (two  
109 from each layer of Trout Bog) that were sequenced using the Illumina TruSeq protocol on the  
110 Illumina GAIIx platform (Data S1). Paired-end sequencing reads were merged with FLASH  
111 v1.0.3 with a mismatch value of less than 0.25 and a minimum of 10 overlapping bases, resulting

112 in merged read lengths of 150-290 bp (Magooc & Salzberg, 2011). 16S rRNA gene amplicon  
113 sequencing was also performed on samples collected with the same method over the same time  
114 periods. This data is available under DOE JGI project IDs 1078703 and 1018581 for Trout Bog  
115 and Lake Mendota, respectively. Samples from Trout Bog were sequenced on the 454 GS FLX-  
116 Titanium platform (Roche 454, Branford, CT, USA) targeting the V8 hypervariable region  
117 (primer 1392R: ACGGGCGGTGTGTRC) (Engelbrektson et al., 2010), and sequences were  
118 trimmed to 324 base pairs using VSEARCH (v2.3.4) (Rognes et al., 2016). Samples from Lake  
119 Mendota were sequenced on an Illumina MiSeq, and the V4 region was targeted using paired-  
120 end sequencing (primers 525F: GTGCCAGCMGCCGCGGTAA and 806R:  
121 GGACTACHVGGGTWTCTAAT) (Caporaso et al., 2012). Both datasets were trimmed based  
122 on alignment quality and chimera checking using mothur v.1.39.5 (Schloss et al., 2009).  
123 Unclustered unique sequences were assigned taxonomy using TaxAss (Rohwer et al., 2017) to  
124 leverage the FreshTrain (version FreshTrain25Jan2018Greengenes13\_5) (Newton et al., 2011)  
125 and Greengenes (version 13\_5) (DeSantis et al., 2006).

## 126 **Assembly and Binning**

127 To recover MAGs, metagenomic reads were pooled by lake and layer and then assembled  
128 as previously described (Bendall et al., 2016; Roux et al., 2017). In Trout Bog, this assembly was  
129 performed using SOAPdenovo2 at various k-mer sizes (Luo et al., 2012), and the resulting  
130 contigs were combined using Minimus (Sommer et al., 2007). In Lake Mendota, merged reads  
131 were assembled using Ray v2.2.0 with a single k-mer size (Boisvert et al., 2012). Contigs from  
132 the combined assemblies were binned using MetaBAT (-veryspecific settings, minimum bin size  
133 of 20kb, and minimum contig size of 2.5kb) (Kang et al., 2015), and reads from unpooled  
134 metagenomes were mapped to the assembled contigs using the Burrows-Wheeler Aligner ( $\geq 95\%$

135 sequence identity,  $n = 0.05$ ) (Li & Durbin, 2010), which allowed time-series resolved binning  
136 (Table S2). DOE JGI's Integrated Microbial Genome (IMG) database tool  
137 (<https://img.jgi.doe.gov/mer/>) (Markowitz et al., 2012) was used for gene prediction and  
138 annotation. Annotated MAGs can be retrieved directly from the IMG database and JGI's  
139 Genome Portal using the IMG Genome ID provided (also known as IMG Taxon ID). MAG  
140 completeness and contamination/redundancy was estimated based on the presence of a core set  
141 of genes with CheckM (Rinke et al., 2013; Parks et al., 2015), and MAGs were classified using  
142 PhyloSift (Darling et al., 2014) or the phylogeny-based "guilt by association" method (Hamilton  
143 et al., 2017).

#### 144 **Functional Marker Gene Analysis**

145 To analyze functional marker genes in the unassembled, unpooled metagenomes, we used  
146 a curated database of reference protein sequences (Data S2) (Anantharaman et al., 2016) and  
147 identified open reading frames (ORFs) in our unassembled metagenomic time series using  
148 Prodigal (Hyatt et al., 2010). This analysis was conducted on merged reads. The protein  
149 sequences and ORFs were compared using BLASTx (Camacho et al., 2009) with a cutoff of 30%  
150 identity. Significant differences in gene frequency between sites were identified using LEfSE  
151 (Segata et al., 2012). Read abundance was normalized by metagenome size for plotting. We  
152 chose to perform this analysis because gene content in unassembled metagenomes is likely more  
153 quantitative and more representative of the entire microbial community than gene content in the  
154 MAGs.

#### 155 **Pathway Prediction**

156           Only MAGs that were at least 50% complete with less than 10% estimated contamination  
157 (meeting the MIMARKS definition of a medium or high quality MAG) were included in this  
158 study (Bowers et al., 2017). Taxonomy was assigned to MAGs using Phylosift (Darling et al.,  
159 2014). Pathways were analyzed by exporting IMG's functional annotations for the MAGs,  
160 including KEGG, COG, PFAM, and TIGRFAM annotations and mapped to pathways in the  
161 KEGG and MetaCyc databases as previously described (He et al., 2017). To score presence, a  
162 pathway needed at least 50% of the required enzymes encoded by genes in a MAG and if there  
163 were steps unique to a pathway, at least one gene encoding each unique step. Putative pathway  
164 presences was aggregated by lake and phylum in order to link potential functions identified in  
165 the metagenomes to taxonomic groups that may perform those functions in each lake. Glycoside  
166 hydrolases were annotated using dbCAN (<http://csbl.bmb.uga.edu/dbCAN>) (Yin et al., 2012).  
167 Nitrogen usage in amino acids was calculated by taking the average number of nitrogen atoms in  
168 translated ORF sequences across each MAG.

169           Data formatting and plotting was performed in R (R Core Team (2017). R: A language  
170 and environment for statistical computing. R Foundation for Statistical Computing, Vienna,  
171 Austria. URL <https://www.R-project.org/>.) using the following packages: ggplot2 (H. Wickham.  
172 ggplot2: Elegant Graphics for Data Analysis. Springer-Verlag New York, 2009.), cowplot (Claus  
173 O. Wilke (2017). cowplot: Streamlined Plot Theme and Plot Annotations for 'ggplot2'. R  
174 package version 0.9.2. <https://CRAN.R-project.org/package=cowplot>), reshape2 (Hadley  
175 Wickham (2007). Reshaping Data with the reshape Package. Journal of Statistical Software,  
176 21(12), 1-20. URL <http://www.jstatsoft.org/v21/i12/>.), and APE (Paradis E., Claude J. &  
177 Strimmer K. 2004. APE: analyses of phylogenetics and evolution in R language. Bioinformatics  
178 20: 289-290.). The datasets, scripts, and intermediate files used to predict pathway presence and



179 absence are available at <<https://github.com/McMahonLab/MAGstravaganza>>. Any future  
180 updates or refinements to this dataset will be available at this link.

## 181 **Results/Discussion**

### 182 **Community Functional Marker Gene Analysis**

183 To assess potential differences in microbial metabolisms between Lake Mendota and  
184 Trout Bog, we tested whether functional marker genes identified in the unassembled merged  
185 metagenomic reads appeared more frequently in one lake or layer compared to the others. These  
186 comparisons were run between the epilimnia of Trout Bog and Lake Mendota, and between the  
187 epilimnion and hypolimnion of Trout Bog. We did not compare the epilimnion of Lake Mendota  
188 to the hypolimnion of Trout Bog, as the multitude of factors differing between these two sites  
189 make this comparison illogical. Many genes differed significantly by site, indicating contrasting  
190 gene content between lakes and layers (Data S3). To further infer differences in microbial  
191 metabolism, we aggregated marker genes by function (as several marker genes from a  
192 phylogenetic range were included in the database for each type of function) and tested for  
193 significant differences in distribution between lakes and layers using a Wilcoxon rank sum test  
194 with a Bonferroni correction for multiple pairwise testing. Many functional markers were found  
195 to be significantly more abundant in specific sites; more will be reported in each of the following  
196 sections (Figure 1, Table S3). These contrasting abundances of functional marker genes suggest  
197 significant differences in the metabolisms of microbial communities across lake environments.

### 198 **How Representative are the MAGs?**

199 To identify the phylogenies of the microbes carrying marker genes and the co-  
200 occurrences of marker genes within the same population genomes, we used metagenome-

201 assembled genomes (MAGs) from each metagenomic time series to predict metabolic pathways  
202 based on genomic content. A total of 193 medium to high quality bacterial MAGs were  
203 recovered from the three combined time series metagenomes in Trout Bog and Lake Mendota:  
204 99 from Lake Mendota, 31 from Trout Bog's epilimnion, and 63 from Trout Bog's hypolimnion  
205 (Data S4). These population genomes ranged in estimated completeness from 50 to 99% based  
206 on CheckM estimates (Parks et al., 2015). Several MAGs from Trout Bog's epilimnion and  
207 hypolimnion appeared to belong to the same population based on average nucleotide identities  
208 greater than 99% calculated using DOE JGI's ANI calculator (Data S6) (Varghese et al., 2015).  
209 This is likely because assembly and binning were carried out separately for each thermal layer,  
210 even though some populations were present throughout the water column. To assess the diversity  
211 of our MAGs, we constructed an approximate maximum likelihood tree of all the MAGs in  
212 FastTree (Price, Dehal & Arkin, 2010) using whole genome alignments (Figure S1). The tree is  
213 not intended to infer detailed evolutionary history, but to provide an overall picture of similarity  
214 between genomes. MAGs recovered are a diverse set of genomes assigned to taxa typically  
215 observed in freshwater.

216         The phylum-level assignments of our MAGs largely matched the classifications of 16S  
217 rRNA gene amplicon sequencing results averaged across the time series, consistent with a higher  
218 likelihood of recovering MAGs from the most abundant populations in the community (Figure  
219 S2, Data S5). However, some taxa, including *Tenericutes*, *Ignavibacteria*,  
220 *Epsilonproteobacteria*, and *Chlamydiae*, were represented by MAGs but not identified in the 16S  
221 gene amplicon datasets. *Chlorobi* was overrepresented by MAG coverage compared to 16S  
222 rRNA gene counts, while *Proteobacteria* was overrepresented by 16S rRNA gene counts  
223 compared to MAG coverage. These discrepancies could be explained by bias in the 16S primer

224 sets (Hong et al., 2009) difference in *rRNA* copy number, or assembly bias in MAG recovery.  
225 The observed taxonomic compositions are consistent with other 16S-based studies from these  
226 lakes (Hall et al., 2017; Linz et al., 2017). The detection of similar phyla using both methods  
227 suggests that our MAGs are representative of the resident microbial communities.

## 228 **Nitrogen Cycling**

229 Nitrogen availability is an important factor structuring freshwater microbial communities.  
230 To see if there were differences in nitrogen cycling between different lake environments, we  
231 analyzed nitrogen-related marker genes and the MAGs containing nitrogen cycling pathways.  
232 We discovered significant differences in the abundances of marker genes, along with  
233 phylogenetic differences in the populations containing these pathways.

234 To identify differences in nitrogen fixation between sites, we analyzed marker genes  
235 encoding nitrogenase subunits. Genes encoding for nitrogenase were observed most frequently in  
236 metagenomes from Trout Bog's hypolimnion, followed by the Trout Bog's epilimnion, and lastly  
237 by Lake Mendota's epilimnion (Figure 1, Table S3). The nitrogenase enzyme is inhibited by  
238 oxygen, which could explain the higher abundance of nitrogenase in Trout Bog's anoxic  
239 hypolimnion. We further analyzed MAGs predicted to fix nitrogen and found differences in the  
240 taxonomy of putative diazotrophs between the two ecosystems (Figure 2, Figure S1). In Lake  
241 Mendota, two thirds of MAGs encoding the nitrogen fixation pathway were classified as  
242 *Cyanobacteria*, while the other third was assigned to *Betaproteobacteria* and  
243 *Gammaproteobacteria*. Although not all *Cyanobacteria* fix nitrogen, previous measurements of  
244 nitrogen fixation in Lake Mendota found a strong correlation between this pathway and the  
245 *Cyanobacteria Aphanizomenon* (Beverdors, Miller & McMahon, 2013). MAGs containing  
246 genes encoding nitrogen fixation were more phylogenetically diverse in Trout Bog and included

247 *Deltaproteobacteria*, *Gammaproteobacteria*, *Epsilonproteobacteria*, *Acidobacteria*,  
248 *Verrucomicrobia*, *Chlorobi*, and *Bacteroidetes*. The increased diversity of diazotrophs in Trout  
249 Bog compared to Lake Mendota suggests that nitrogen fixation genes may be horizontally  
250 transferred with populations in Trout Bog.

251 To identify differences in denitrification, we analyzed marker genes for denitrification,  
252 including reductases for nitrous oxide, nitric oxide, nitrite, and nitrate. These denitrification  
253 genes had a similar trend as the nitrogen fixation genes; they were observed most frequently in  
254 metagenomes from the Trout Bog hypolimnion, with the exception of nitrous oxide reductase,  
255 which was most frequently found in Lake Mendota. This trend could stem from denitrification  
256 also requiring a reductive, low oxygen environment. Urease, another nitrogen cycling marker  
257 gene, was not found significantly more often in any site. We further analyzed putative  
258 denitrification pathways in our MAGs and found that they were observed at similar frequencies  
259 in population genomes from all environments (Figure 2). Urea degradation pathways were also  
260 predicted in MAGs from both lakes, which is consistent with research showing that urea is a  
261 common nitrogen source for bacteria in multiple freshwater environments (Remsen, Carpenter &  
262 Schroeder, 1972; Jorgenson et al., 1998; Berman & Bronk, 2003).

263 To explore the importance of polyamines in the freshwater nitrogen cycle, we analyzed  
264 genes encoding the biosynthesis and degradation of polyamines such as spermidine and  
265 putrescine. We predicted that 94% of MAGs could synthesize polyamines, and 87% could  
266 degrade polyamines. These genes were prevalent in many diverse MAGs from both lakes,  
267 including *Actinobacteria* as has been previously observed (Ghylin et al., 2014; Hamilton et al.,  
268 2017). While there is some evidence for the importance of polyamines in aquatic systems (Mou  
269 et al., 2011), the ecological role of these compounds in freshwater is not fully resolved.

270 Polyamines are known to play a critical but poorly understood role in bacterial metabolism  
271 (Igarashi & Kashiwagi, 1999), and the exchange of these nitrogen compounds between  
272 populations may be a factor structuring freshwater microbial communities. Polyamines can also  
273 result from the decomposition of amino acids, so higher trophic levels such as fish or  
274 zooplankton may provide an additional source (Al Bulushi et al., 2009). The frequent appearance  
275 of polyamine-related pathways in our MAGs lends support to the hypothesis that these  
276 compounds are important parts of the dissolved organic nitrogen and carbon pool in freshwater.

277 To identify signatures of nitrogen limitation at the genomic level, we analyzed biases in  
278 amino acid use in our MAGs (Data S4) (Acquisti, Kumar & Elser, 2009; Bragg & Wagner,  
279 2009). For this analysis, genomes from the Trout Bog layers were considered together due to the  
280 previously mentioned overlap in recovered genomes. We observed that on average, MAGs from  
281 Trout Bog encoded amino acids with 1% less nitrogen than MAGs from Lake Mendota.  
282 Although this difference is small, it was significant using a Wilcoxon rank sum test ( $p = 0.02$ ).  
283 The observed amino acid bias suggests that conditions in Trout Bog may lead to stronger  
284 selection for nitrogen poor proteins than in Lake Mendota. Differences in the compositions of the  
285 nitrogen pools in these lakes may also contribute to the observed differences in the distributions  
286 of nitrogen cycling marker genes. Lake Mendota receives large amounts of nitrate runoff from  
287 the surrounding agricultural landscape, while Trout Bog receives nitrogen in more complex  
288 forms (e.g. *Sphagnum*-derived organic nitrogen), and the microbial community competes for  
289 nitrogen with the surrounding plant community.

## 290 **Sulfur Cycling**

291 Sulfur is another essential element in freshwater that is cycled between oxidized and  
292 reduced forms by microbes. Our marker gene analysis demonstrated that genes encoding for

293 sulfide:quinone reductase (for sulfide oxidation) and the sox pathway (for thiosulfate oxidation)  
294 were significantly more abundant in Trout Bog compared to Lake Mendota, with no significant  
295 differences between the layers of Trout Bog (Figure 1, Table S3). Genes encoding for sulfite  
296 reductases were the least abundant sulfur cycling marker genes in all sites. Dissimilatory sulfite  
297 reductase was observed only in MAGs from Trout Bog, especially those classified as  
298 *Chlorobiales*. Because this enzyme is thought to operate in reverse in green sulfur-oxidizing  
299 phototrophs such as *Chlorobiales* (Holkenbrink et al., 2011), this may indicate an oxidation  
300 process rather than a reductive sulfur pathway. Assimilatory sulfate reduction was the most  
301 common sulfur-related pathway identified in the MAGs (Figure 2).

302 We observed assimilatory sulfate reduction more frequently than dissimilatory sulfate  
303 reduction, suggesting that in these populations, sulfate is more commonly used for biosynthesis,  
304 while reduced forms of sulfur are used as electron donors for energy mobilization. This is in  
305 contrast to marine systems, where sulfate reduction holds a central role as an energy source for  
306 organotrophic energy acquisition (Bowles et al., 2014), although sulfate reduction could also be  
307 occurring in Lake Mendota's hypolimnion. Sulfur oxidation pathways were observed in MAGs  
308 classified as *Betaproteobacteria* from both lakes and *Epsilonproteobacteria* in Trout Bog's  
309 hypolimnion.

## 310 **Phototrophy**

311 Primary production (the coupling of photosynthesis and carbon fixation) is a critical  
312 component of the freshwater carbon cycle. To identify differences in routes of primary  
313 production between freshwater environments, we compared marker genes for carbon fixation  
314 across sites. RuBisCO (ribulose-1,5-bisphosphate carboxylase/oxygenase), the marker gene for  
315 carbon fixation via the Calvin-Benson-Bassham (CBB) pathway, was most frequently observed

316 in Trout Bog's epilimnion (Figure 1, Table S3). In contrast, citrate lyase, the marker gene for the  
317 reverse TCA cycle, was observed most frequently in Trout Bog's hypolimnion.

318 We next assessed the MAGs for photoautotrophy, expecting to find differences between  
319 our two study sites based on the observed contrasts in the functional marker gene analysis  
320 (Figure 2). In Lake Mendota, the majority of MAGs encoding phototrophic pathways were  
321 classified as *Cyanobacteria*. These populations contained genes encoding enzymes in the CBB  
322 pathway. In Trout Bog, most MAGs encoding phototrophy were classified as *Chlorobium*  
323 *clathratiforme*, a species of *Chlorobiales* widespread in humic lakes (Karhunen et al., 2013). The  
324 *Chlorobiales* MAGs in Trout Bog contained genes encoding citrate lyase and other key enzymes  
325 in the reductive tricarboxylic acid (TCA) cycle, an alternative carbon fixation method commonly  
326 found in green sulfur bacteria such as *Chlorobi* (Kanao et al., 2002; Tang & Blankenship, 2010).  
327 As *Chlorobium* is a strictly anaerobic lineage, the presence of citrate lyase in these populations  
328 may explain why this gene was observed more frequently in metagenomes from Trout Bog's  
329 hypolimnion. These photoautotrophs from both lakes also contained genes potentially encoding  
330 nitrogen fixation. The co-occurrence of fixation pathways in these populations are especially  
331 interesting given their relatively high abundance in their respective lakes.

332 The reductive TCA cycle is the only carbon fixation pathway known to be active in  
333 cultured representatives of *Chlorobiales*, but we found genes annotated as the RuBisCO large  
334 subunit (*rbcL*) were observed in some of the *Chlorobiales* MAGs. Homologs of *rbcL* have been  
335 previously identified in isolates of *Chlorobium*, and were associated with sulfur metabolism and  
336 oxidative stress (Hanson & Tabita, 2001). Inspection of the neighborhoods of genes annotated as  
337 *rbcL* in the *Chlorobiales* MAGs revealed genes putatively related to rhamnose utilization, LPS  
338 assembly, and alcohol dehydrogenation, but no other CBB pathway enzymes. Given this

339 information, it seems likely that this *rbcL* homolog encodes a function other than carbon fixation  
340 in the *Chlorobiales* MAGs.

341 The potential for photoheterotrophy via the aerobic anoxygenic phototrophic pathway  
342 was identified in several MAGs from all lake environments, especially from epilimnia, based on  
343 the presence of genes annotated as *pufABCLMX*, *puhA*, and *pucAB* encoding the core reaction  
344 center RC-LH1 (Martinez-Garcia et al., 2012). *Betaproteobacteria* and *Gammaproteobacteria*,  
345 particularly MAGs classified as *Burkholderiales*, most often contained these genes, although  
346 they were not broadly shared across the phylum (Figure 2). As aerobic anoxygenic phototrophy  
347 has previously been associated with freshwater *Proteobacteria* (Martinez-Garcia et al., 2012),  
348 these results are not surprising. Unexpectedly, an *Acidobacteria* MAG from the Trout Bog  
349 epilimnion also contained genes suggesting aerobic anoxygenic phototrophy.

350 Another form of photoheterotrophy previously identified in freshwater is the use of light-  
351 activated proteins such as rhodopsins (Martinez-Garcia et al., 2012). We observed genes  
352 encoding rhodopsins in MAGs from each lake environment, but more frequently in  
353 *Actinobacteria* and *Bacteroidetes* MAGs from Lake Mendota (Figure 2). Trout Bog, especially  
354 the hypolimnion, harbored fewer, less diverse MAGs encoding rhodopsins than those from Lake  
355 Mendota.

### 356 **Complex Carbon Degradation**

357 Biopolymers in freshwater can be either autochthonous (produced within the lake, ex.  
358 algal polysaccharides) or allochthonous (imported from the surrounding landscape, ex.  
359 cellulose). Organic carbon in freshwater is often classified as either autochthonous or  
360 allochthonous carbon, but this distinction has little relevance for organotrophic bacteria. For



361 example, there is substantial overlap in the molecular composition of algal exudates, cellulose  
362 degradation intermediates, and photochemical degradation products (Bertilsson & Tranvik, 1998;  
363 Ramanan et al., 2015). One-carbon compounds such as methane are produced in the lake  
364 (therefore autochthonous), but they are also produced from decomposition of allochthonous  
365 carbon. We therefore found it more informative to categorize the carbon degradation pathways  
366 observed in our dataset by type of metabolism rather than carbon origin.

367 Degradation of high-complexity, recalcitrant carbon compounds requires specialized  
368 enzymes, but a wide availability of these compounds can make complex carbon degradation an  
369 advantageous trait. One way to predict the ability to degrade high-complexity carbon in  
370 microbial populations is by identifying genes annotated as glycoside hydrolases (GHs), which  
371 encode enzymes that break the glycosidic bonds found in complex carbohydrates. A previous  
372 study of *Verrucomicrobia* MAGs from our dataset found that the profiles of GHs differed  
373 between Lake Mendota and Trout Bog, potentially reflecting the differences in available carbon  
374 sources (He et al., 2017). Here, we expanded this analysis of glycoside hydrolases to all of the  
375 MAGs in our dataset to identify differences in how populations from our two study sites degrade  
376 complex carbohydrates.

377 We calculated the coding density of GHs, defined as the percentage of coding regions in  
378 a MAG annotated as a GH to identify differences in carbon metabolism between MAGs from  
379 different lake environments (Figure 3). Our GH coding density metric was significantly  
380 correlated with the diversity of GHs identified ( $r^2 = 0.39$ ,  $p = 4.5 \times 10^{-8}$ ), which is an indicator of  
381 the number of substrates an organism can utilize. The MAGs with the highest GH coding  
382 densities were classified as *Bacteroidales*, *Ignavibacteriales*, *Sphingobacteriales*, and  
383 *Verrucomicrobiales* from Trout Bog's hypolimnion. Two of these orders, *Sphingobacteriales*

384 and *Verrucomicrobiales*, also contained MAGs with high GH coding densities in Lake Mendota  
385 and Trout Bog's epilimnion. There were several additional orders with high GH coding density  
386 that were unique to Lake Mendota, including *Mycoplasmatales* (*Tenericutes*), *Cytophagales*  
387 (*Bacteroidetes*), *Planctomycetales* (*Planctomycetes*), and *Puniceicoccales* (*Verrucomicrobia*). In  
388 concordance with their ability to hydrolytically degrade biopolymers to sugars, MAGs with high  
389 GH coding densities also contained putative degradation pathways for a variety of sugars (Figure  
390 2).

391 We identified genes encoding for several GH families in MAGs from all lake  
392 environments. Starting with the most frequently observed in MAGS from all sites, these included  
393 GH109 (alpha-N-acetylgalactosaminidase), GH74 (endoglucanase), and GH23 (soluble lytic  
394 transglycosylase). However, previous research has found that the abundance of genes annotated  
395 as GH109 by dbCAN may be an overestimate of this gene family (He et al., 2017); therefore, we  
396 prefer not to speculate on the relative importance of GH family annotations in our MAGs based  
397 on observation frequency. Lake Mendota contained unique GHs belonging to the family GH13  
398 (alpha-glucoside). The only unique GH found in Trout Bog's epilimnion was GH62, a putative  
399 arabinofuranosidase. Trout Bog's hypolimnion contained many more unique enzymes, the most  
400 abundant of which were GH129 (alpha-N-acetylgalactosaminidase), GH89 (alpha-N-  
401 acetylglucosaminidase), GH43\_12 (xylosidase/arabinosidase), GH44 (beta-mannanase/endo-  
402 beta-1,4-glucanase), GH66 (dextranase), and GH67 (alpha-glucuronidase). The increased  
403 diversity of these genes found in Trout Bog's hypolimnion suggests differences between the GH  
404 profiles, which could be correlated to differing diversity and complexity of the available organic  
405 carbon.

#### 406 **Central Metabolism and Simple Carbon Degradation**

407           Freshwater microbes are exposed to a great variety of low-complexity carbon sources  
408 such as carbohydrates, carboxylic acids, and one-carbon (C1) compounds. The central metabolic  
409 pathways shared by most living cells are often an entry point for the least complex carbon  
410 compounds. The specific routing of central metabolism may therefore reveal how low  
411 complexity carbon compounds are used. Genes encoding enzymes in the glyoxylate cycle, a  
412 truncated version of the TCA cycle that is used to produce biosynthetic intermediates and bypass  
413 decarboxylation steps, were observed in *Alphaproteobacteria* and *Chlamydiae* in Lake Mendota  
414 and *Acidobacteria* and *Betaproteobacteria* in Trout Bog. This may indicate an adaptation to  
415 reduce carbon demand in these populations.

416           Oxidative phosphorylation is an important part of central metabolism for aerobic bacteria,  
417 so we investigated the types of cytochrome oxidases encoded in our MAGs (Figure 2).  
418 Cytochrome c oxidases, both aa3- and cbb3-type, were widespread in all three lake environments  
419 and frequently co-occurred within MAGs. aa3-type cytochromes are associated with high oxygen  
420 concentrations and cbb3-type cytochromes are associated with low oxygen concentrations (Gong  
421 et al., 2018), so the presence of genes encoding both types suggests the flexibility to operate  
422 under a range of oxygen concentrations. Of the quinol-based cytochrome oxidases, genes  
423 encoding cytochrome d oxidase were most often observed in MAGs from Trout Bog's  
424 hypolimnion, while cytochrome aa3-600 was found only in MAGs classified as *Bacteroidetes*  
425 and *Betaproteobacteria* from Trout Bog's epilimnion. Cytochrome o oxidase was observed only  
426 in a *Chlamydia* MAG from Lake Mendota. Alternative complex III was identified in MAGs of  
427 *Verrucomicrobia* in all sites, in *Acidobacteria* from Trout Bog (both layers), and in  
428 *Bacteroidetes* and *Planctomycetes* from Lake Mendota.

429           Similarly, hydrogen metabolism can influence other aspects of a microbe's nutrient  
430 usage. Iron-only hydrogenases were found primarily in MAGs from Trout Bog's hypolimnion  
431 (Figure 2, Table S3), consistent with their previously identified presence in anaerobic, often  
432 fermentative bacteria (Peters et al., 2015) and the higher observations of marker genes for iron-  
433 only hydrogenases in the hypolimnion site. Genes encoding [Ni-Fe] hydrogenases of groups 1  
434 and 2, involved in hydrogen uptake, sensing, and nitrogen fixation, were found at significantly  
435 different frequency in all sites with the exceptions of group 2a in Lake Mendota and Trout Bog's  
436 epilimnion and group 2b in both layers of Trout Bog. Genes encoding these hydrogenases were  
437 widespread in MAGs from Trout Bog's hypolimnion, found only in *Chlorobiales* MAGs in Trout  
438 Bog's epilimnion, and rarely observed in MAGs from Lake Mendota. Group 3 [Ni-Fe]  
439 hydrogenases were detected differentially at each site dependent on their subtype and were  
440 identified in MAGs belonging to *Cyanobacteria* and *Chlorobiales* in both lakes. This finding is  
441 consistent with the proposed function of Group 3d, which is to remove excess electrons produced  
442 by photosynthesis. Group 4 [Ni-Fe] hydrogenases were not observed significantly more or less in  
443 any site.

444           Low molecular weight carbohydrates such as glucose, fucose, rhamnose, arabinose,  
445 galactose, mannose, and xylose may be derived either from algae or from cellulose degradation  
446 (Giroldo, Augusto & Vieira, 2005; Ramanan et al., 2015). To understand how these compounds  
447 are used by freshwater populations, we analyzed putative sugar degradation pathways in our  
448 MAGs. Genes encoding the pathway for mannose degradation, which feeds into glycolysis,  
449 appeared frequently in both lakes. Genes encoding the degradation of rhamnose and fucose,  
450 whose pathways converge to enter glycolysis and produce pyruvate, were frequently found  
451 within the same MAGs (including members of *Planctomycetes* and *Verrucomicrobia* from Lake

452 Mendota, and members of *Bacteroidetes*, *Ignavibacteria*, and *Verrucomicrobia* from Trout Bog).  
453 Putative pathways for galactose degradation were often observed in these same MAGs. Xylose is  
454 a freshwater sugar which has already been identified as potential carbon source for streamlined  
455 Actinobacteria (Ghylin et al., 2014); we confirmed this in our MAGs, and found that  
456 *Bacteroidetes*, *Planctomycetes*, and *Verrucomicrobia* from Lake Mendota and *Bacteroidetes* and  
457 *Verrucomicrobia* from Trout Bog were additional potential xylose degraders. Genes for the  
458 degradation of glycolate, an acid produced by algae and consumed by heterotrophic bacteria  
459 (Paver & Kent, 2017), were identified in *Cyanobacteria* and *Betaproteobacteria* MAGs from  
460 Lake Mendota and in *Acidobacteria*, *Verrucomicrobia*, *Alpha-*, *Beta-*, *Gamma-*, and  
461 *Epsilonproteobacteria* MAGs from Trout Bog.

462 Methylophony, the ability to grow solely on C1 compounds such as methane or  
463 methanol, was predicted in MAGs from both Trout Bog and Lake Mendota. Putative pathways  
464 for methanol degradation were found in MAGs classified as *Methylophilales* (now merged with  
465 *Nitrosomonadales* (Boden, Hutt & Rae, 2017)) and *Methylophenera*, while *Methylococcales*  
466 MAGs were potential methane degraders based on the presence of genes encoding methane  
467 monooxygenase. *Methylococcales* MAGs from Trout Bog also encoded the pathway for nitrogen  
468 fixation, consistent with reports of nitrogen fixation in cultured isolates of this taxon (Bowman,  
469 Sly & Stackebrandt, 1995). The *Methylophilales* MAGs also likely degrade methylamines, based  
470 on the presence of genes encoding the N-methylglutamate pathway or the tetrahydrofolate  
471 pathway (Latypova et al., 2010). Methylophony in cultured freshwater isolates from these taxa is  
472 well-documented (Kalyuzhnaya et al., 2011; Salcher et al., 2015); however, genes encoding  
473 methanol degradation were also identified in MAGs classified as *Burkholderiales* and  
474 *Rhizobiales* from Trout Bog. Given the rapid rate at which we are discovering methylophony in

475 microorganisms not thought to be capable of this process, identifying potential new  
476 methyloprophs in freshwater is intriguing, but not surprising (Chistoserdova, Kalyuzhnaya &  
477 Lidstrom, 2009).

#### 478 **Using MAGs to track population abundances over time**

479 Our metagenomes comprise a time series, so we can use MAG coverage and the number  
480 of marker gene hits as proxies for abundance over time. As an example, we analyzed abundance  
481 data for *Cyanobacteria*, known to be highly variable over time in Lake Mendota (Figure 4, A-E).  
482 We found that one *Cyanobacteria* MAG in each year was substantially more abundant than the  
483 rest; this single MAG only is plotted for each year. Since our analysis of the diversity of MAGs  
484 containing nitrogenases showed a strong association between nitrogen fixation and  
485 *Cyanobacteria* in Lake Mendota, we hypothesized that the number of hits to the most abundant  
486 marker genes encoding nitrogenase subunits over time would be correlated to the abundance of  
487 the most abundant *Cyanobacteria* MAG in each year (Figure 4, F-J). This hypothesis was  
488 partially supported. Two of the marker genes, TIGR1282 (*nifD*) and TIGR1286 (*nifK* specific for  
489 molybdenum-iron nitrogenase), correlated with the *Cyanobacteria* MAG abundance more  
490 frequently than the third, TIGR1287 (*nifH*, common among different types of nitrogenases).  
491 Significant correlations ( $p < 0.05$ ) were only detected in 2008, 2011, and 2012. The strength of  
492 these correlations suggests that in three out of the five years in our Lake Mendota time series, a  
493 single *Cyanobacteria* population produced most genes encoding nitrogenase subunits. In the  
494 other two years, it is possible that other diazotrophic populations were more abundant, or that the  
495 nitrogenase subunits were derived from populations that did not assemble into MAGs. These two  
496 years were also unusual in our time series - in 2008, extreme flooding events led to large  
497 *Cyanobacteria* blooms (Beverdors et al., 2015) and in 2009, the invasive spiny water flea

498 population drastically increased in Lake Mendota (Walsh, Munoz & Vander Zanden, 2016). Still,  
499 our time series analysis demonstrates the utility of our datasets in linking metabolic function to  
500 specific taxonomic groups.

## 501 **Conclusions**

502 Our analysis of functional marker genes indicated significant differences in microbial  
503 nutrient cycling between Lake Mendota's epilimnion, Trout Bog's epilimnion, and Trout Bog's  
504 hypolimnion. By combining these results with metabolic pathway prediction in MAGs, we  
505 identified taxa encoding these metabolisms and co-occurrence of pathways within MAGs. We  
506 found that phototrophy, carbon fixation, and nitrogen fixation co-occurred within the abundant  
507 phototrophs *Cyanobacteria* in Lake Mendota and *Chlorobiales* in Trout Bog. In Lake Mendota,  
508 nitrogen fixation was predominantly associated with *Cyanobacteria*, but it was not associated  
509 with any particular taxon in Trout Bog. In the sulfur cycle, we observed assimilatory pathways  
510 more frequently than dissimilatory pathways in the MAGs, suggesting a bias towards using  
511 sulfur compounds for biosynthesis rather than as electron donors. We found the greatest density  
512 and diversity of genes annotated as GHs in the Trout Bog hypolimnion, potentially indicating a  
513 greater reliance on complex carbon sources in this environment. Our combination of functional  
514 marker gene analysis and MAG pathway prediction provided insight into the complex  
515 metabolisms underpinning freshwater communities and how microbial processes scale to  
516 ecosystem functions.

## 517 **Acknowledgments**

518 We thank the North Temperate Lakes and Lake Mendota Microbial Observatory field  
519 crews, UW-Trout Lake Station, the UW Center for Limnology, and the Global Lakes Ecological

520 Observatory Network for field and logistical support. We acknowledge efforts by many  
521 McMahon laboratory undergraduate students and technicians whose work has been related to  
522 sample collection and DNA extraction. We thank Emily Stanley and Joshua Hamilton for  
523 insightful comments on an early draft of this manuscript. Finally, we personally thank the  
524 individual program directors and leadership at the National Science Foundation for their  
525 commitment to continued support of long-term ecological research.

526 We thank the Joint Genome Institute for supporting this work through the Community  
527 Sequencing Program (CSP 394), performing the bioinformatics, and providing technical support.  
528 The work conducted by the U.S. Department of Energy Joint Genome Institute, a DOE Office of  
529 Science User Facility, is supported by the Office of Science of the U.S. Department of Energy  
530 under Contract No. DE-AC02-05CH11231. K.D.M. acknowledges funding from the United  
531 States National Science Foundation Microbial Observatories program (MCB-0702395), the Long  
532 Term Ecological Research Program (NTL-LTER DEB- 1440297), and an INSPIRE award  
533 (DEB-1344254). A.M.L. was supported by a pre-doctoral fellowship provided by the University  
534 of Wisconsin – Madison Department of Bacteriology and by the National Science Foundation  
535 Graduate Research Fellowship Program under grant no. DGE-1256259 during this research. This  
536 material is also based upon work that supported by the National Institute of Food and  
537 Agriculture, U.S. Department of Agriculture (Hatch Project 1002996).

## 538 **Figure and Table Legends**

539

540 **Table 1. Characteristics of Lake Mendota and Trout Bog.** Water from Lake Mendota and  
541 Trout Bog was sampled weekly during the ice-free periods using an integrated water column  
542 sampler and filtered for DNA using a 0.22 micron filter. Metagenomic sequencing was  
543 performed on DNA extracted from filters collected in 2008-2012 from Lake Mendota and in  
544 2007-2009 from Trout Bog. The epilimnion (upper thermal layer) was sampled in both lakes,



545 while the hypolimnion (bottom thermal layer) was sampled only in Trout Bog. Chemistry data  
546 were collected by NTL-LTER from depth discrete samples taken from 0 and 4 m for Lake  
547 Mendota, 0 m for the Trout Bog Epilimnion, and 3 and 7 m for the Trout Bog Hypolimnion.  
548 Values reported here are the means of all measurements in the sampling time span for each lake,  
549 with standard deviations reported in parentheses.

550 **Figure 1. Analysis of marker gene abundances reveals differences between lakes and layers.**

551 To assess potential differences in microbial metabolisms in our study sites, we predicted open  
552 reading frames in unassembled metagenomes using Prodigal and compared the resulting ORFs to  
553 a custom database of metabolic marker genes using BLAST. In these boxplots, significant  
554 differences in numbers of gene hits between sites was tested using a pairwise Wilcoxon rank sum  
555 test with a Bonferroni correction; significance was considered to be  $p < 0.05$ . 94 metagenomes  
556 were tested for Lake Mendota, while 47 metagenomes were tested in each layer of Trout Bog.  
557 Significant differences between the Trout Bog and Lake Mendota epilimnia and between the  
558 Trout Bog epilimnion and hypolimnion are indicated by a green or a purple star, respectively.  
559 Significant differences between the Trout Bog hypolimnion and the Lake Mendota epilimnion  
560 were not tested, as the large number of variables differing in these sites makes the comparison  
561 less informative. This analysis revealed differences in the number of marker genes observed by  
562 lake for many metabolic processes involved in carbon, nitrogen, and sulfur cycling. LEfSe  
563 results for each gene are available in Data S3, and p-values of markers described in Figure 1 and  
564 elsewhere in the text are reported in Table S3.

565

566 **Figure 2. Metabolisms in Lake Mendota and Trout Bog.** Metabolic pathways were predicted  
567 for all MAGs based on their gene content. At least 50% of enzymes in a pathway must have been  
568 encoded in the genome for a pathway to be considered present, as well as encoding enzymes  
569 unique to or required for a pathway. Putative pathway presence was aggregated by lake and  
570 phylum. This analysis can link potential functions identified in the metagenomes to taxonomic  
571 groups that may perform those functions. For example, MAGs with putative pathways for carbon  
572 fixation also likely fix nitrogen in both lakes. Similar, putative degradation pathways for  
573 rhamnose, fucose, and galactose were frequently encoded in the same MAGs. *Proteobacteria*  
574 was split into classes due to the high diversity of this phylum.

575 **Figure 3. Glycoside hydrolase content in the MAGs.** Annotations of GHs were used as an  
576 indication of complex carbon degradation. Genes potentially encoding GHs were identified and  
577 assigned CAZyme annotations using dbCAN. GH coding density was calculated for each MAG  
578 and averaged by order and lake (A). While a few orders contained genes encoding glycoside  
579 hydrolases in all three sites, many orders were unique to each site. The orders with the highest  
580 coding density were all found in the Trout Bog hypolimnion. Glycoside hydrolase diversity, an  
581 indicator of the range of substrates an organism can degrade, was significantly correlated with  
582 coding density ( $r^2 = 0.38$ ,  $p = 4.5 \times 10^{-8}$ ). Within MAGs with high glycoside hydrolase density,  
583 three families appeared most frequently - GH74, GH109, and GH23, although these abundances  
584 may be method-dependent (He et al., 2017) (B-D). *Proteobacteria* was split into classes due to  
585 the high diversity of this phylum.

586 **Figure 4. Cyanobacteria and nitrogen fixation over time.** To approximate the abundance of  
587 populations over time, we mapped metagenomic reads back to the MAGs. The number of  
588 BLAST hits of marker genes in the metagenomes was used as a proxy for gene abundance.

589 Counts were normalized by metagenome size, and in the case of the MAGs, genome length. Data  
590 from *Cyanobacteria* MAGs and nitrogen fixation marker genes are shown here. Colored  
591 numbers on panels A, C, E, G, and I indicate the IMG OID of the most abundant MAG in that  
592 year of data, plotted here. The marker genes used were TIGR1282, TIGR1286, and TIGR1287,  
593 encoding subunits of Mo-Fe nitrogenase; these were the most frequently observed nitrogenase  
594 markers in the Lake Mendota metagenomes. Significantly correlated trends over time were  
595 observed in the MAGs and the nitrogenase marker genes in 2008, 2011, and 2012. This suggests  
596 that nitrogen fixation is driven by these particular MAGs in those years, and is consistent with  
597 our result indicating that genes encoding nitrogen fixation were found in these MAGs. The lack  
598 of significant correlations in other years may be due to contributions from unassembled  
599 populations or more even abundances of other diazotrophic populations in that year.

## 600 Supplemental Legends

601 **Table S1. Additional chemical measurements in our study sites.** Additional chemistry data  
602 were collected by NTL-LTER (<http://lter.limnology.wisc.edu>) from depth discrete samples taken  
603 from 0 and 4 m for Lake Mendota, 0 m for the Trout Bog Epilimnion, and 3 and 7 m for the  
604 Trout Bog Hypolimnion. Values reported here are the means of all measurements in the  
605 sampling time span for each lake, with standard deviations reported in parentheses.

606 **Data S1. IMG Genome ID numbers and information about metagenomes used in this**  
607 **study.** This dataset includes information about the metagenomes used in this study including  
608 date collected, size in reads and base pairs, and their IMG Genome IDs (IMG Taxon ID).

609 **Data S2. Functional marker genes used in this study.** This dataset lists the TIGRFAM, COG,  
610 or PFAM IDs of sequences used as functional marker genes to analyze how gene content differs  
611 by site.

612 **Table S2. Statistics from genome assembly and binning.** Metagenomic samples were pooled  
613 by lake and layer to allow time-resolved binning. The time series in Lake Mendota spans 2008-  
614 2012, while the Trout Bog time series spans 2007-2009. The large amount of DNA assembled  
615 produced just under 200 medium to high quality metagenome-assembled genomes.

616 **Data S3. Results of LEfSe analysis on functional marker genes.** The program LEfSe was used  
617 to detect significant differences in gene content between our study sites. The distinguish feature  
618 of LEfSe, the LDA effect score, is listed for each marker gene in this dataset.

619 **Table S3. P-values of marker gene distributions between sites.** A Wilcoxon rank sum test was  
620 used to non-parametrically test for significant differences in functional marker gene distributions  
621 between our study sites. P-values of less than 0.05 are considered significant.

622 **Data S4. MAG metadata.** Information about the completeness, size, and taxonomy of our  
623 MAGs, as well as their IMG OIDs, are presented here. Amino acid use was calculated based on  
624 the average number of nitrogen atoms translated gene sequences.

625 **Data S5. 16S rRNA amplicon sequencing of our samples.** 16S sequencing was performed over  
626 the time series to assess community composition in our study sites. The resulting OTU tables and  
627 taxonomic classifications are presented here.

628 **Figure S1. Tree of diversity and nitrogen fixation in our MAGs.** To visualize the diversity of  
629 our MAGs, phylogenetic marker genes were extracted from each MAG and aligned using

630 Phylosift. An approximate maximum-likelihood tree based on these alignments was constructed  
631 using FastTree. The potential for nitrogen fixation based on gene content is indicated on the  
632 branch tips.

633 **Figure S2. How representative are the MAGs of the microbial communities?** The  
634 community composition observed via 16S rRNA gene amplicon sequencing (A) and inferred  
635 using the proportions of reads from the same metagenomic time series samples that mapped to  
636 set of MAGs affiliated with major phyla (B). MAGs were classified using Phylosift, while 16S  
637 sequences were classified to the phylum level. Numbers above bars indicating abundances  
638 greater than the limit of the y-axis. The 16S V6-V8 region was targeted in Trout Bog, while the  
639 V4 region was targeted in Lake Mendota. *Proteobacteria* was split into classes due to the high  
640 diversity of this phylum. Although proportions vary, similar taxonomic groups are observed  
641 using both approaches. Differences are likely due to a combination of primer and assembly  
642 biases. However, similar phyla were detected using both methods, suggesting that our MAG  
643 datasets are representative of their communities.

644 **Data S6. Average nucleotide identity between MAGs.** Average nucleotide identity (ANI) was  
645 calculated between all MAGs in our dataset. MAGs with extremely high ANIs (>97%) are likely  
646 from the same populations. An ANI value of “0” indicates that no portions of the genomes  
647 aligned.

## 648 **References**

- 649 Acquisti C., Kumar S., Elser JJ. 2009. Signatures of nitrogen limitation in the elemental  
650 composition of the proteins involved in the metabolic apparatus. *Proceedings of the Royal*  
651 *Society B: Biological Sciences* 276:2605–2610. DOI: 10.1098/rspb.2008.1960.
- 652 Allgaier M., Grossart H-P. 2006. Diversity and Seasonal Dynamics of Actinobacteria  
653 Populations in Four Lakes in Northeastern Germany. *Applied and Environmental*  
654 *Microbiology* 72:3489–3497. DOI: 10.1128/AEM.72.5.3489.
- 655 Anantharaman K., Brown CT., Hug LA., Sharon I., Castelle CJ., Probst AJ., Thomas BC., Singh  
656 A., Wilkins MJ., Karaoz U., Brodie EL., Williams KH., Hubbard SS., Banfield JF. 2016.  
657 Thousands of microbial genomes shed light on interconnected biogeochemical processes in  
658 an aquifer system. *Nature Communications* 7:1–11. DOI: 10.1038/ncomms13219.
- 659 Azam F., Fenchel T., Field JG., Gray JC., Meyer-Reil LA., Thingstad F. 1983. The ecological  
660 role of water-column microbes in the sea. *Marine Ecology Progress Series* 10:257–264.  
661 DOI: 10.3354/meps010257.
- 662 Bendall ML., Stevens SLR., Chan L., Malfatti S., Schwientek P., Tremblay J., Schackwitz W.,  
663 Martin J., Pati A., Bushnell B., Froula J., Kang D., Tringe SG., Bertilsson S., Moran MA.,  
664 Shade A., Newton RJ., McMahon KD., Malmstrom RR. 2016. Genome-wide selective  
665 sweeps and gene-specific sweeps in natural bacterial populations. *The ISME Journal*  
666 10:1589–1601. DOI: 10.1038/ismej.2015.241.
- 667 Berman T., Bronk DA. 2003. Dissolved organic nitrogen: A dynamic participant in aquatic  
668 ecosystems. *Aquatic Microbial Ecology* 31:279–305. DOI: 10.3354/ame031279.
- 669 Bertilsson S., Tranvik LJ. 1998. Photochemically produced carboxylic acids as substrates for

- 670 freshwater bacterioplankton. *Limnology and Oceanography* 43:885–895. DOI:  
671 10.4319/lo.1998.43.5.0885.
- 672 Beversdorf LJ., Chaston SD., Miller TR., McMahon KD. 2015. Microcystin mcyA and mcyE  
673 gene abundances are not appropriate indicators of microcystin concentrations in lakes.  
674 *PLOS ONE* 10:1–18. DOI: 10.1371/journal.pone.0125353.
- 675 Beversdorf LJ., Miller TR., McMahon KD. 2013. The Role of Nitrogen Fixation in  
676 Cyanobacterial Bloom Toxicity in a Temperate, Eutrophic Lake. *PLOS ONE* 8:1–11. DOI:  
677 10.1371/journal.pone.0056103.
- 678 Boden R., Hutt LP., Rae AW. 2017. Reclassification of *Thiobacillus aquaesulis* (Wood & Kelly,  
679 1995) as *Annwoodia aquaesulis* gen. nov., comb. nov., transfer of *Thiobacillus* (Beijerinck,  
680 1904) from the Hydrogenophilales to the Nitrosomonadales, proposal of Hydrogenophilalia  
681 class. nov. withi. *International Journal of Systematic and Evolutionary Microbiology*  
682 67:1191–1205. DOI: 10.1099/ijsem.0.001927.
- 683 Boisvert S., Raymond F., Godzaridis É., Laviolette F., Corbeil J. 2012. Ray Meta: scalable de  
684 novo metagenome assembly and profiling. *Genome Biology* 13:1–13. DOI: 10.1186/gb-  
685 2012-13-12-r122.
- 686 Bowers RM., Kyrpides NC., Stepanauskas R., Harmon-Smith M., Doud D., Reddy TBK., Schulz  
687 F., Jarett J., Rivers AR., Eloe-Fadrosh EA., Tringe SG., Ivanova NN., Copeland A., Clum  
688 A., Becraft ED., Malmstrom RR., Birren B., Podar M., Bork P., Weinstock GM., Garrity  
689 GM., Dodsworth JA., Yooseph S., Sutton G., Glöckner FO., Gilbert JA., Nelson WC.,  
690 Hallam SJ., Jungbluth SP., Etema TJG., Tighe S., Konstantinidis KT., Liu WT., Baker BJ.,  
691 Rattei T., Eisen JA., Hedlund B., McMahon KD., Fierer N., Knight R., Finn R., Cochrane  
692 G., Karsch-Mizrachi I., Tyson GW., Rinke C., Lapidus A., Meyer F., Yilmaz P., Parks DH.,  
693 Eren AM., Schriml L., Banfield JF., Hugenholtz P., Woyke T. 2017. Minimum information  
694 about a single amplified genome (MISAG) and a metagenome-assembled genome  
695 (MIMAG) of bacteria and archaea. *Nature Biotechnology* 35:725–731. DOI:  
696 10.1038/nbt.3893.
- 697 Bowles MW., Mogollon JM., Kasten S., Zabel M., Hinrichs K-U. 2014. Global rates of marine  
698 sulfate reduction and implications for sub-sea-floor metabolic activities. *Science Express*  
699 *Reports*. DOI: 10.1038/35351.
- 700 Bowman JP., Sly LI., Stackebrandt E. 1995. The phylogenetic position of the family  
701 Methylococcaceae. *International Journal of Systematic Bacteriology* 45:182–5. DOI:  
702 10.1099/00207713-45-3-622a.
- 703 Bragg JG., Wagner A. 2009. Protein material costs: single atoms can make an evolutionary  
704 difference. *Trends in Genetics* 25:5–8. DOI: 10.1016/j.tig.2008.10.011.
- 705 Al Bulushi I., Poole S., Deeth HC., Dykes GA. 2009. Biogenic amines in fish: Roles in  
706 intoxication, spoilage, and nitrosamine formation-A review. *Critical Reviews in Food*  
707 *Science and Nutrition* 49:369–377. DOI: 10.1080/10408390802067514.
- 708 Butman D., Stackpoole S., Stets E., McDonald CP., Clow DW., Striegl RG. 2015. Aquatic  
709 carbon cycling in the conterminous United States and implications for terrestrial carbon  
710 accounting. *Proceedings of the National Academy of Sciences*:1–6. DOI:

- 711 10.1073/pnas.1512651112.
- 712 Camacho C., Coulouris G., Avagyan V., Ma N., Papadopoulos J., Bealer K., Madden TL. 2009.  
713 BLAST plus: architecture and applications. *BMC Bioinformatics* 10:1–9. DOI: Artn  
714 421\nDoi 10.1186/1471-2105-10-421.
- 715 Caporaso JG., Lauber CL., Walters WA., Berg-Lyons D., Huntley J., Fierer N., Owens SM.,  
716 Betley J., Fraser L., Bauer M., Gormley N., Gilbert JA., Smith G., Knight R. 2012. Ultra-  
717 high-throughput microbial community analysis on the Illumina HiSeq and MiSeq platforms.  
718 *The ISME Journal* 6:1621–1624. DOI: 10.1038/ismej.2012.8.
- 719 Chistoserdova L., Kalyuzhnaya MG., Lidstrom ME. 2009. The Expanding World of  
720 Methylophilic Metabolism. *Annual Review of Microbiology* 63:477–499. DOI:  
721 10.1146/annurev.micro.091208.073600.
- 722 Darling AE., Jospin G., Lowe E., Matsen FA., Bik HM., Eisen JA. 2014. PhyloSift: phylogenetic  
723 analysis of genomes and metagenomes. *PeerJ* 2:e243. DOI: 10.7717/peerj.243.
- 724 DeSantis TZ., Hugenholtz P., Larsen N., Rojas M., Brodie EL., Keller K., Huber T., Dalevi D.,  
725 Hu P., Andersen GL. 2006. Greengenes, a chimera-checked 16S rRNA gene database and  
726 workbench compatible with ARB. *Applied and Environmental Microbiology* 72:5069–5072.  
727 DOI: 10.1128/AEM.03006-05.
- 728 Eiler A., Mondav R., Sinclair L., Fernandez-Vidal L., Scofield D., Scwientek P., Martinez-  
729 Garcia M., Torrents D., McMahon KD., Andersson SGE., Stepanauskas R., Woyke T.,  
730 Bertilsson S. 2016. Tuning fresh: radiation through rewiring of central metabolism in  
731 streamlined bacteria. *The ISME Journal* 10:1–13. DOI: 10.13140/RG.2.1.1968.9040.
- 732 Engelbrektson AL., Kunin V., Wrighton KC., Zvenigorodsky N., Chen F., Ochman H.,  
733 Hugenholtz P. 2010. Experimental factors affecting PCR-based estimates of microbial  
734 species richness and evenness. *The ISME Journal* 4:642.
- 735 Ghylis TW., Garcia SL., Moya F., Oyserman BO., Schwientek P., Forest KT., Mutschler J.,  
736 Dwulit-Smith J., Chan L-K., Martinez-Garcia M., Sczyrba A., Stepanauskas R., Grossart H-  
737 P., Woyke T., Warnecke F., Malmstrom R., Bertilsson S., McMahon KD. 2014.  
738 Comparative single-cell genomics reveals potential ecological niches for the freshwater acI  
739 Actinobacteria lineage. *The ISME Journal* 8:2503–16. DOI: 10.1038/ismej.2014.135.
- 740 del Giorgio PA., Cole JJ., Cimleris A. 1997. Respiration rates in bacteria exceed phytoplankton  
741 production in unproductive aquatic systems. *Nature* 385:148–151.
- 742 Girollo D., Augusto A., Vieira H. 2005. Polymeric and free sugars released by three  
743 phytoplanktonic species from a freshwater tropical eutrophic reservoir. *Journal of Plankton*  
744 *Research* 27:695–705. DOI: 10.1093/plankt/fbi043.
- 745 Gong X., Garcia-Robledo E., Revsbech N-P., Schramm A. 2018. Gene Expression of Terminal  
746 Oxidases in Two Marine Bacterial Strains Exposed to Nanomolar Oxygen Concentrations.  
747 *FEMS Microbiology Ecology*. DOI: 10.1093/femsec/fiy072/4983120.
- 748 Hall MW., Rohwer RR., Perrie J., McMahon KD., Beiko RG. 2017. Ananke: temporal  
749 clustering reveals ecological dynamics of microbial communities. *PeerJ* 5:1–19. DOI:  
750 10.7717/peerj.3812.

- 751 Hamilton JJ., Garcia SL., Brown BS., Oyserman BO., Moya-Flores F., Bertilsson S., McMahon  
752 Katherine D. 2017. Metabolic Network Analysis and Metatranscriptomics Reveal  
753 Auxotrophies and Nutrient Sources of the Cosmopolitan Freshwater Microbial Lineage acI.  
754 *mSystems* 2:1–13.
- 755 Hanson TE., Tabita FR. 2001. A ribulose-1,5-bisphosphate carboxylase/oxygenase (RubisCO)-  
756 like protein from *Chlorobium tepidum* that is involved with sulfur metabolism and the  
757 response to oxidative stress. *Proceedings of the National Academy of Sciences* 98:4397–  
758 4402. DOI: 10.1073/pnas.081610398.
- 759 He S., Stevens SL., Chan L-K., Bertilsson S., Glavina Del Rio T., Tringe SG., Malmstrom RR.,  
760 McMahon KD. 2017. Ecophysiology of Freshwater Verrucomicrobia Inferred from  
761 Metagenome-Assembled Genomes. *mSphere* 2:1–17.
- 762 Holkenbrink C., Barbas SO., Mellerup A., Otaki H., Frigaard NU. 2011. Sulfur globule oxidation  
763 in green sulfur bacteria is dependent on the dissimilatory sulfite reductase system.  
764 *Microbiology* 157:1229–1239. DOI: 10.1099/mic.0.044669-0.
- 765 Hong S., Bunge J., Leslin C., Jeon S., Epstein SS. 2009. Polymerase chain reaction primers miss  
766 half of rRNA microbial diversity. *The ISME Journal* 3:1365–1373. DOI:  
767 10.1038/ismej.2009.89.
- 768 Hyatt D., Chen GL., LoCascio PF., Land ML., Larimer FW., Hauser LJ. 2010. Prodigal:  
769 Prokaryotic gene recognition and translation initiation site identification. *BMC*  
770 *Bioinformatics* 11. DOI: 10.1186/1471-2105-11-119.
- 771 Igarashi K., Kashiwagi K. 1999. Polyamine transport in bacteria and yeast. *Biochem. J.* 344:633–  
772 642.
- 773 Jorgenson NO., Tranvik LJ., Edling H., Graneli W., Lindell M. 1998. Effects of sunlight on  
774 occurrence and bacterial turnover of specific carbon and nitrogen compounds in lake water.  
775 *FEMS Microbiology Ecology* 25:217–227.
- 776 Kalyuzhnaya MG., Beck DAC., Vorobev A., Smalley N., Kunkel DD., Lidstrom ME.,  
777 Chistoserdova L. 2011. Novel methylotrophic isolates from lake sediment, description of  
778 *Methylotenera versatilis* sp. nov. and emended description of the genus *Methylotenera*.  
779 *International Journal of Systematic and Evolutionary Microbiology* 62:106–111. DOI:  
780 10.1099/ijs.0.029165-0.
- 781 Kanao T., Kawamura M., Fukui T., Atomi H., Imanaka T. 2002. Characterization of isocitrate  
782 dehydrogenase from the green sulfur bacterium *Chlorobium limicola*: A carbon dioxide-  
783 fixing enzyme in the reductive tricarboxylic acid cycle. *European Journal of Biochemistry*  
784 269:1926–1931. DOI: 10.1046/j.1432-1327.2002.02849.x.
- 785 Kang DD., Froula J., Egan R., Wang Z. 2015. MetaBAT, an efficient tool for accurately  
786 reconstructing single genomes from complex microbial communities. *PeerJ* 3:e1165. DOI:  
787 10.7717/peerj.1165.
- 788 Karhunen J., Arvola L., Peura S., Tirola M. 2013. Green sulphur bacteria as a component of the  
789 photosynthetic plankton community in small dimictic humic lakes with an anoxic  
790 hypolimnion. *Aquatic Microbial Ecology* 68:267–272. DOI: 10.3354/ame01620.

- 791 Latypova E., Yang S., Wang Y., Wang T., Chavkin TA., Hackett M., Schäfer H., Kalyuzhnaya  
792 MG. 2010. Genetics of the glutamate-mediated methylamine utilization pathway in the  
793 facultative methylotrophic beta-proteobacterium *Methyloversatilis universalis* FAM5.  
794 *Molecular Microbiology* 75:426–439. DOI: 10.1111/j.1365-2958.2009.06989.x.
- 795 Li H., Durbin R. 2010. Fast and accurate long-read alignment with Burrows-Wheeler transform.  
796 *Bioinformatics* 26:589–595. DOI: 10.1093/bioinformatics/btp698.
- 797 Linz AM., Crary BC., Shade A., Owens S., Gilbert JA., Knight R., McMahon KD. 2017.  
798 Bacterial Community Composition and Dynamics Spanning Five Years in Freshwater Bog  
799 Lakes. *mSphere* 2:1–15. DOI: e00169-17.
- 800 Luo R., Liu B., Xie Y., Li Z., Huang W., Yuan J., He G., Chen Y., Pan Q., Liu Y., Tang J., Wu  
801 G., Zhang H., Shi Y., Liu Y., Yu C., Wang B., Lu Y., Han C., Cheung DW., Yiu S-M.,  
802 Peng S., Xiaoqian Z., Liu G., Liao X., Li Y., Yang H., Wang J., Lam T-W., Wang J. 2012.  
803 SOAPdenovo2: an empirically improved memory-efficient short-read de novo assembler.  
804 *GigaScience* 1:1–6. DOI: 10.1186/2047-217X-1-18.
- 805 Magooc T., Salzberg SL. 2011. FLASH: Fast length adjustment of short reads to improve  
806 genome assemblies. *Bioinformatics* 27:2957–2963. DOI: 10.1093/bioinformatics/btr507.
- 807 Markowitz VM., Chen IMA., Palaniappan K., Chu K., Szeto E., Grechkin Y., Ratner A., Jacob  
808 B., Huang J., Williams P., Huntemann M., Anderson I., Mavromatis K., Ivanova NN.,  
809 Kyrpides NC. 2012. IMG: The Integrated Microbial Genomes database and comparative  
810 analysis system. *Nucleic Acids Research* 40:115–122. DOI: 10.1093/nar/gkr1044.
- 811 Martinez-Garcia M., Swan BK., Poulton NJ., Gomez ML., Masland D., Sieracki ME.,  
812 Stepanauskas R. 2012. High-throughput single-cell sequencing identifies photoheterotrophs  
813 and chemoautotrophs in freshwater bacterioplankton. *The ISME Journal* 6:113–123. DOI:  
814 10.1038/ismej.2011.84.
- 815 Mou X., Vila-Costa M., Sun S., Zhao W., Sharma S., Moran MA. 2011. Metatranscriptomic  
816 signature of exogenous polyamine utilization by coastal bacterioplankton. *Environmental*  
817 *Microbiology* 3:798–806. DOI: 10.1111/j.1758-2229.2011.00289.x.
- 818 Newton RJ., Jones SE., Eiler A., McMahon KD., Bertilsson S. 2011. A guide to the natural  
819 history of freshwater lake bacteria. *Microbiology and Molecular Biology Reviews* 75:14–49.  
820 DOI: 10.1128/MMBR.00028-10.
- 821 Parks DH., Imelfort M., Skennerton CT., Hugenholtz P., Tyson GW. 2015. CheckM: assessing  
822 the quality of microbial genomes recovered from isolates, single cells, and metagenomes.  
823 *Genome Research* 25:1043–1055.
- 824 Paver SF., Kent AD. 2017. Temporal Patterns in Glycolate-Utilizing Bacterial Community  
825 Composition Correlate with Phytoplankton Population Dynamics in Humic Lakes.  
826 *Microbial Ecology* 60:406–418. DOI: 10.1007/S00248-0.
- 827 Peters JW., Schut GJ., Boyd ES., Mulder DW., Shepard EM., Broderick JB., King PW., Adams  
828 MWW. 2015. [FeFe]- and [NiFe]-hydrogenase diversity, mechanism, and maturation.  
829 *Biochimica et Biophysica Acta - Molecular Cell Research* 1853:1350–1369. DOI:  
830 10.1016/j.bbamcr.2014.11.021.

- 831 Peura S., Eiler A., Bertilsson S., Nyka H., Tiirola M., Jones RI. 2012. Distinct and diverse  
832 anaerobic bacterial communities in boreal lakes dominated by candidate division OD1. *The*  
833 *ISME Journal* 6:1640–1652. DOI: 10.1038/ismej.2012.21.
- 834 Peura S., Sinclair L., Bertilsson S., Eiler A. 2015. Metagenomic insights into strategies of  
835 aerobic and anaerobic carbon and nitrogen transformation in boreal lakes. *Scientific Reports*  
836 5:12102. DOI: 10.1038/srep12102.
- 837 Pomeroy LR., Wiebe WJ. 1988. Energetics of microbial food webs. *Hydrobiologia* 159:7–18.  
838 DOI: 10.1007/BF00007363.
- 839 Price MN., Dehal PS., Arkin AP. 2010. FastTree 2 - Approximately maximum-likelihood trees  
840 for large alignments. *PLOS ONE* 5. DOI: 10.1371/journal.pone.0009490.
- 841 Ramachandran A., Walsh DA. 2015. Investigation of XoxF methanol dehydrogenases reveals  
842 new methylotrophic bacteria in pelagic marine and freshwater ecosystems. *FEMS*  
843 *Microbiology Ecology* 91. DOI: 10.1093/femsec/fiv105.
- 844 Ramanan R., Kim B-H., Cho D-H., Oh H-M., Kim H-S. 2015. Algae–bacteria interactions:  
845 evolution, ecology and emerging applications. *Biotechnology Advances*. DOI:  
846 10.1016/j.biotechadv.2015.12.003.
- 847 Remsen CC., Carpenter EJ., Schroeder BW. 1972. Competition for Urea among Estuarine  
848 Microorganisms. *Ecological Society of America* 53:921–926.
- 849 Rinke C., Schwientek P., Sczyrba A., Ivanova NN., Anderson IJ., Cheng J-F., Darling AE.,  
850 Malfatti S., Swan BK., Gies E a., Dodsworth J a., Hedlund BP., Tsiamis G., Sievert SM.,  
851 Liu W-T., Eisen J a., Hallam SJ., Kyrpides NC., Stepanauskas R., Rubin EM., Hugenholtz  
852 P., Woyke T. 2013. Insights into the phylogeny and coding potential of microbial dark  
853 matter. *Nature* 499:431–437. DOI: 10.1038/nature12352.
- 854 Rognes T., Flouri T., Nichols B., Quince C., Mahé F. 2016. VSEARCH: a versatile open source  
855 tool for metagenomics. *PeerJ* 4:1–18. DOI: 10.7717/peerj.2584.
- 856 Rohwer RR., Hamilton JJ., Newton RJ., McMahon KD. 2017. TaxAss□: Leveraging a Custom  
857 Freshwater Achieves Fine-Scale Taxonomic Resolution. *bioRxiv*.
- 858 Roux S., Chan LK., Egan R., Malmstrom RR., McMahon KD., Sullivan MB. 2017.  
859 Ecogenomics of virophages and their giant virus hosts assessed through time series  
860 metagenomics. *Nature Communications* 8. DOI: 10.1038/s41467-017-01086-2.
- 861 Salcher MM., Neuenschwander SM., Posch T., Pernthaler J. 2015. The ecology of pelagic  
862 freshwater methylotrophs assessed by a high-resolution monitoring and isolation campaign.  
863 *The ISME Journal* 9:2442–2453. DOI: 10.1038/ismej.2015.55.
- 864 Salcher MM., Posch T., Pernthaler J. 2013. In situ substrate preferences of abundant  
865 bacterioplankton populations in a prealpine freshwater lake. *Isme J* 7:896–907. DOI:  
866 10.1038/ismej.2012.162.
- 867 Schloss PD., Westcott SL., Ryabin T., Hall JR., Hartmann M., Hollister EB., Lesniewski RA.,  
868 Oakley BB., Parks DH., Robinson CJ., Sahl JW., Stres B., Thallinger GG., Van Horn DJ.,  
869 Weber CF. 2009. Introducing mothur: Open-source, platform-independent, community-



- 870 supported software for describing and comparing microbial communities. *Applied and*  
871 *Environmental Microbiology* 75:7537–7541. DOI: 10.1128/AEM.01541-09.
- 872 Segata N., Waldron L., Ballarini A., Narasimhan V., Jousson O., Huttenhower C. 2012.  
873 Metagenomic microbial community profiling using unique clade-specific marker genes.  
874 *Nature Methods* 9:811–4. DOI: 10.1038/nmeth.2066.
- 875 Šimek K., Kasalický V., Jezbera J., Jezberová J., Hejzlar J., Hahn MW. 2010. Broad habitat  
876 range of the phylogenetically narrow R-BT065 cluster, representing a core group of the  
877 betaproteobacterial genus limnohabitans. *Applied and Environmental Microbiology* 76:631–  
878 639. DOI: 10.1128/AEM.02203-09.
- 879 Sommer DD., Delcher AL., Salzberg SL., Pop M. 2007. Minimus: a fast, lightweight genome  
880 assembler. *BMC Bioinformatics* 8:64. DOI: 10.1186/1471-2105-8-64.
- 881 Tang KH., Blankenship RE. 2010. Both forward and reverse TCA cycles operate in green sulfur  
882 bacteria. *Journal of Biological Chemistry* 285:35848–35854. DOI:  
883 10.1074/jbc.M110.157834.
- 884 Varghese NJ., Mukherjee S., Ivanova N., Konstantinidis KT., Mavrommatis K., Kyrpides NC.,  
885 Pati A. 2015. Microbial species delineation using whole genome sequences. *Nucleic Acids*  
886 *Research* 43:gkv657-. DOI: 10.1093/nar/gkv657.
- 887 Walsh JR., Munoz SE., Vander Zanden MJ. 2016. Outbreak of an undetected invasive species  
888 triggered by a climate anomaly. *Ecosphere* 7:1–17. DOI: 10.1002/ecs2.1628.
- 889 Williamson CE., Dodds W., Kratz TK., Palmer MA. 2008. Lakes and streams as sentinels of  
890 environmental change in terrestrial and atmospheric processes. *Frontiers in Ecology and the*  
891 *Environment* 6:247–254. DOI: 10.1890/070140.
- 892 Yin Y., Mao X., Yang J., Chen X., Mao F., Xu Y. 2012. DbCAN: A web resource for automated  
893 carbohydrate-active enzyme annotation. *Nucleic Acids Research* 40:445–451. DOI:  
894 10.1093/nar/gks479.
- 895

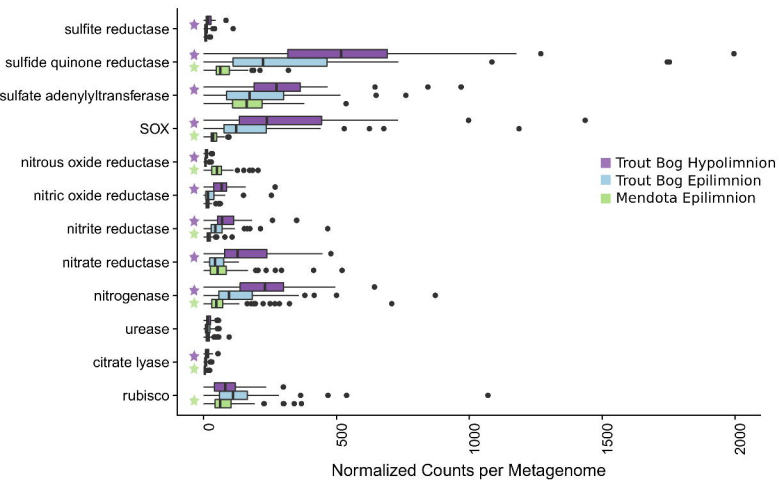

Figure 1. Analysis of marker gene abundances reveals differences between lakes and layers.

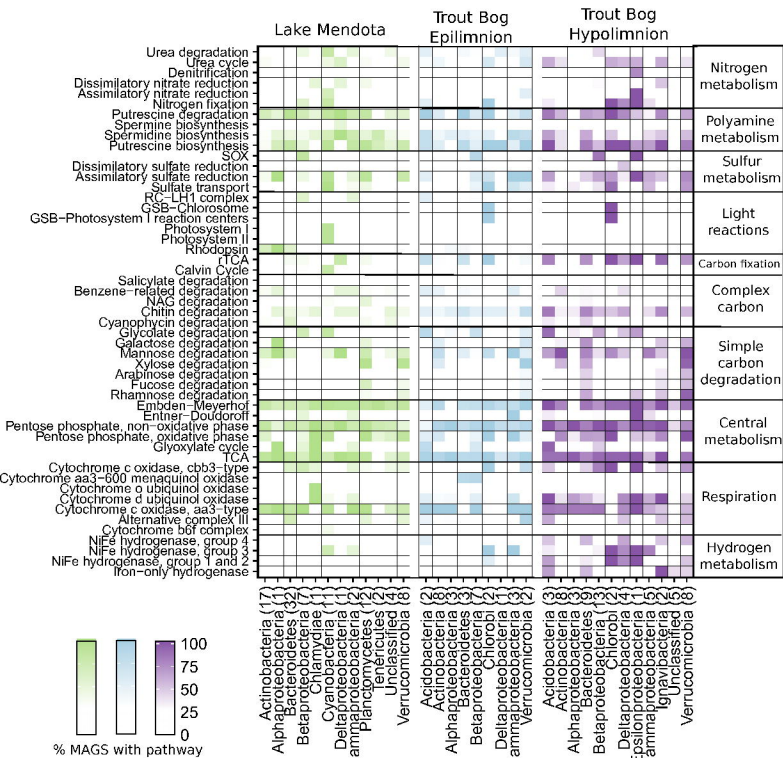

**Figure 2. Metabolisms in Lake Mendota and Trout Bog.**

**A**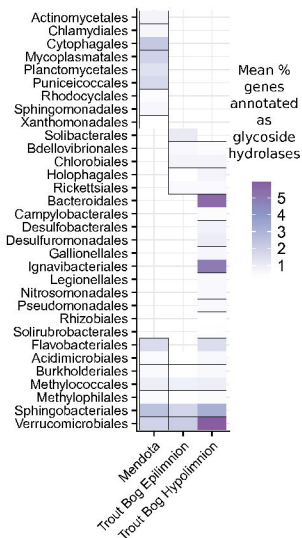**B**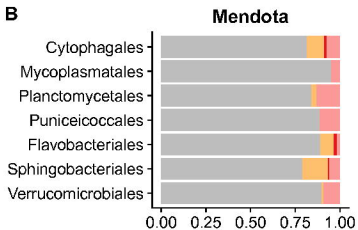**C**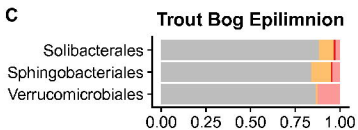**D**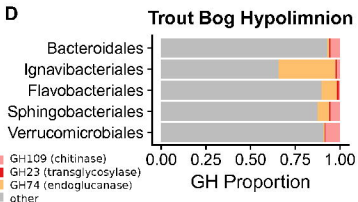

**Figure 3. Glycoside hydrolase content in the MAGs.**

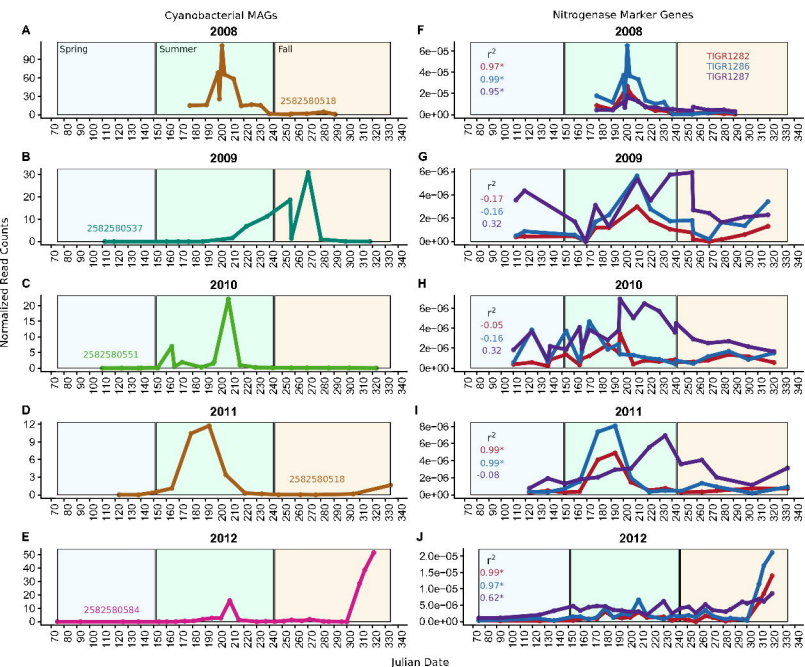

Figure 4. Cyanobacteria and nitrogen fixation over time.
